# Supplementary material for: Gamma synuclein promotes cancer metastasis through the MKK3/6-p38MAPK cascade
Source: PubMed Central journal article supplement (PMC9134903; doi:10.7150/ijbs.69155), 2022-05-01
Supplement: ijbsv18p3167s1.pdf [file ijbsv18p3167s1.pdf]

## Supplementary Information

### Gamma synuclein promotes cancer metastasis through a MKK3/6-p38MAPK cascade

Jieya Liu, Ting Shao, Jin Zhang, Qianyi Liu, Hui Hua, Hongying Zhang, Jiao Wang,  
Ting Luo, Yuenian Eric Shi, Yangfu Jiang

The supplementary information contains figure S1-8 and table S1-2.

#### Supplementary figures

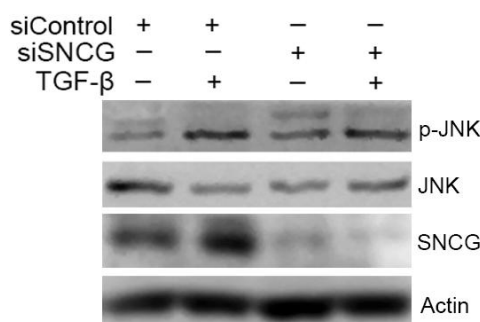

**Figure S1. SNCG knockdown does not affect the induction of JNK phosphorylation by TGF- $\beta$ .** HepG2 cells were transfected with siControl or siSNCG. 24 hours later, the cells were treated with 5 ng/ml TGF- $\beta$  for another 48h, followed by Western blot analysis of indicated proteins.

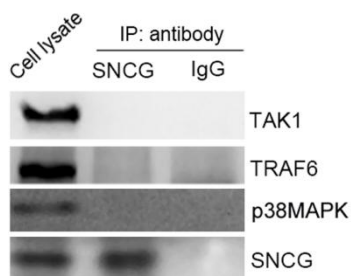

**Figure S2. SNCG does not interact with p38MAPK, TRAF6 and TAK1.** HepG2 lysates were subjected to immunoprecipitation with SNCG antibody or normal IgG, followed by Western blot analysis of p38MAPK, TRAF6, TAK1 and SNCG.

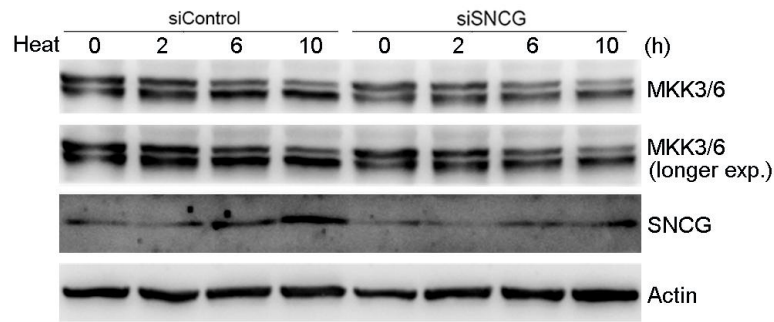

**Figure S3.** SNCG knockdown accelerates heat shock-induced decrease in MKK3 levels. HepG2 cells were transfected with siControl or siSNCG, followed by incubation at 42°C at indicated periods. The total proteins were harvested and subject to western blot analysis of indicated proteins.

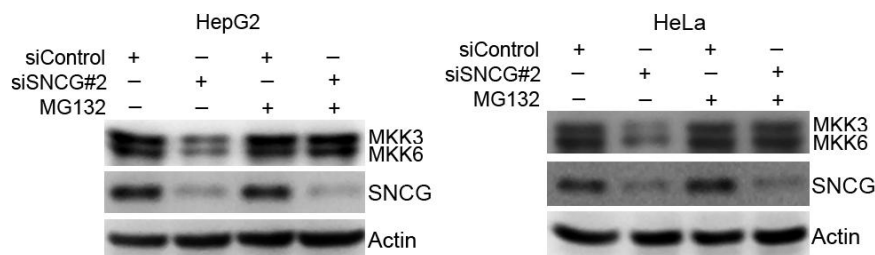

**Figure S4.** MG132 abrogates MKK3/6 down-regulation resulting from SNCG knockdown. HepG2 and HeLa S3 cells were transfected with siControl or siSNCG#2. 24h later, the cells were treated with or without proteasome inhibitor MG132 (5 μM) for another 48 h, followed by western blot analysis of MEK3/6 and SNCG.

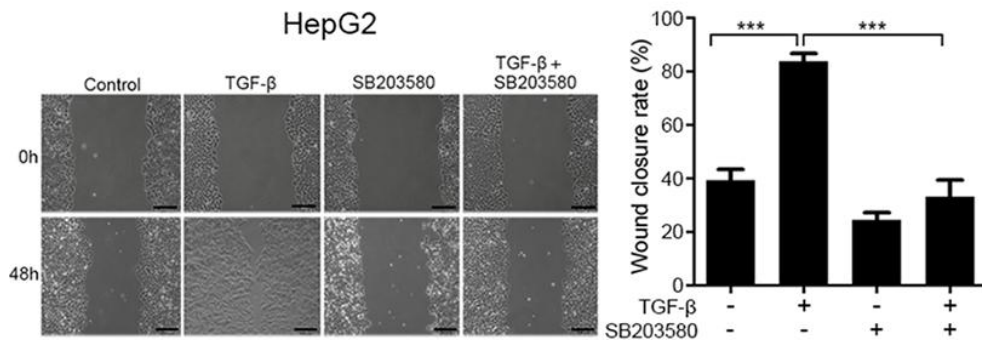

**Figure S5.** SB203580 abrogates TGF-β-induced HepG2 cell migration. HepG2 cells were treated with or without 50 μM of SB203580, 5 ng/ml of TGF-β and 2 μg/ml of mitomycin. Scale bar, 200 μm. The wound closure rate was shown. Values represent mean ± SD (n = 6). \*\*\*, p < 0.001.

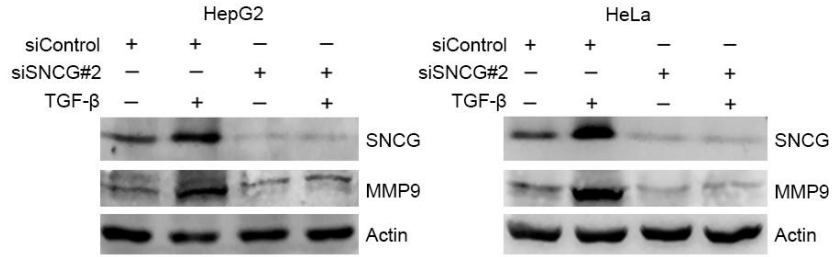

**Figure S6. SNCG knockdown abrogates TGF- $\beta$ -induced MMP-9 expression.** HepG2 and HeLa S3 cells were transfected with siControl or siSNCG#2. 24 hours later, the cells were treated with 10 ng/ml of TGF- $\beta$  for another 48h, followed by Western blot analysis of indicated proteins.

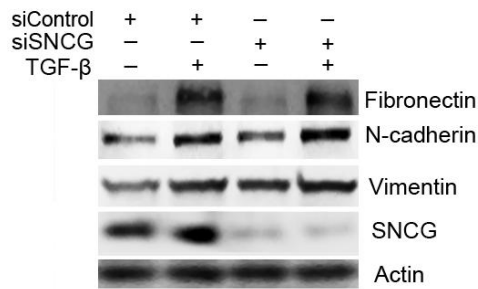

**Figure S7. SNCG knockdown has no effects on TGF- $\beta$ -induced fibronectin, vimentin and N-cadherin expression.** HepG2 cells were transfected with siControl or siSNCG. 24 hours later, the cells were treated with 5 ng/ml of TGF- $\beta$  for another 48h, followed by Western blot analysis of indicated proteins.

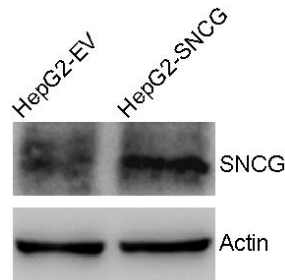

**Figure S8. The expression of SNCG in HepG2 cells transfected with the empty vector (HepG2-EV) or SNCG expression plasmid (HepG2-SNCG).** HepG2-EV and HepG2-SNCG cells lysates were subjected to Western blot analysis of indicated proteins.

## Supplementary tables

**Table S1: siRNA target sequences**

| siRNA          | Target sequences                 |
|----------------|----------------------------------|
| siSNCG         | 5'-GCAGCTGAGAAGACCAAGG-3'        |
| siSNCG#2       | 5'-GGAGAATGTTGTACAGAGC-3'        |
| siP38 $\alpha$ | 5'-CAGACCATTTCAGTCCATCATTTCAT-3' |

**Table S2: Primers sequences**

| Gene         | Forward sequences             | Reverse sequences            |
|--------------|-------------------------------|------------------------------|
| <i>SNCG</i>  | 5'-ATGCGGCTGCCACGCTCCT-3'     | 5'-GTCTTGGCTCCCACATACAT-3'   |
| <i>MKK3</i>  | 5'-CTTGGTGACCATCTCAGAACTGG-3' | 5'-CTTCTGCTCCTGTGAGTTCACG-3' |
| <i>MKK6</i>  | 5'-GCCTCAGACCAGTTCCAC-3'      | 5'-GCATCTTCTCCACCACCC-3'     |
| <i>GAPDH</i> | 5'-AATCGCATCATCATAACCTG-3'    | 5'-CATCCTGCCCATCATACTC-3'    |
